# Supplementary material for: Assisted reproductive technologies (ARTs): Evaluation of evidence to support public policy development
Source: PubMed Central journal article supplement (PMC4233043; doi:10.1186/1742-4755-11-76), 2014-11-07
Supplement: 12978_2014_327_MOESM17_ESM.pdf [file 12978_2014_327_MOESM17_ESM.pdf]

Records identified through database searching  
= 3,076 citations

Additional records identified through other sources  
= 0 relevant

Records after duplicates removed  
= 1,733 citations

Records screened  
= 1,733 citations

Records excluded  
= 1,654 citations

Full-text articles assessed for eligibility  
= 79 citations

Full-text articles excluded  
= 46 citations  
Primary reason for exclusion:  
publication date prior to 2007 (4), full text article not available in English (3), no useable outcomes reported (2), not a systematic review (22), IVF/ICSI could not be differentiated from other treatments (3), assessment of treatment 'add-on' (8), comparison out of scope of review (4)

Systematic reviews included in the review  
= 33
