# Supplementary material for: Assisted reproductive technologies (ARTs): Evaluation of evidence to support public policy development
Source: PubMed Central journal article supplement (PMC4233043; doi:10.1186/1742-4755-11-76), 2014-11-07

0% 20% 40% 60% 80% 100%

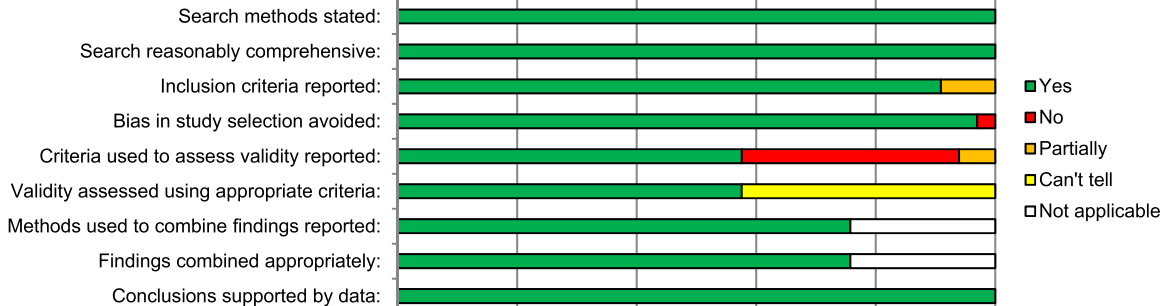

Supplement: 12978_2014_327_MOESM19_ESM.pdf [file 12978_2014_327_MOESM19_ESM.pdf]
